# Supplementary material
Source: PubMed Central journal article supplement (PMC3821387)
Supplement: NIHMS492261-supplement-01.pdf [file NIHMS492261-supplement-01.pdf]

## Supplementary Figure Legends

### **Figure S1: Expression of late pancreatic endocrine differentiation markers Sst and Nkx6.1 in WT and RAR $\beta$ KO ES cells**

Transcript expression analyses of late stage endocrine pancreatic differentiation markers in WT and RAR $\beta$ KO ES cells. RT-PCR analyses of (A) Sst and (B) Nkx6.1 mRNA were performed in both cell lines at 11 and 17 days of the differentiation protocol (Fig. 1A). Relative levels, normalized to HPRT1 levels for each marker tested, are shown in histograms (n=3; N/S: p>0.05).

### **Figure S2: Microarray analysis of pluripotency and pancreatic markers expression in WT and RAR $\beta$ KO ES cells**

Microarray based gene expression profiling of WT and RAR $\beta$  KO ES cells. Expression levels of pluripotency markers Pou5f1, Sox2, and Rex1, and early pancreatic endoderm markers Gata4, Gata6, and FoxA1 in WT +RA (1  $\mu$ M, 48 h), as well as untreated (NT) and RA-treated RAR $\beta$  KO ES cells are presented as variation percentages (% changes) over untreated (NT) WT ES cells. (n=3, p $\leq$ 0.05, error bars = 5% of total value).

**A**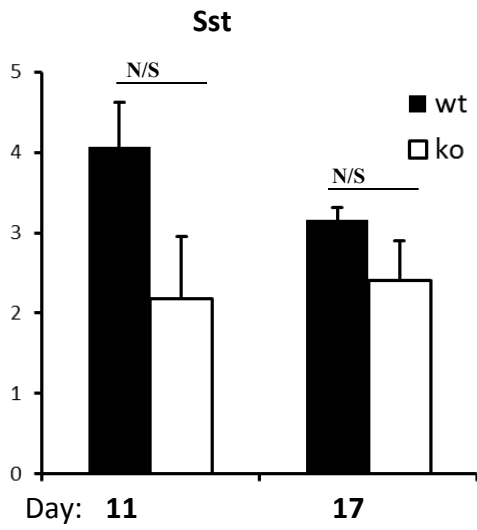**B**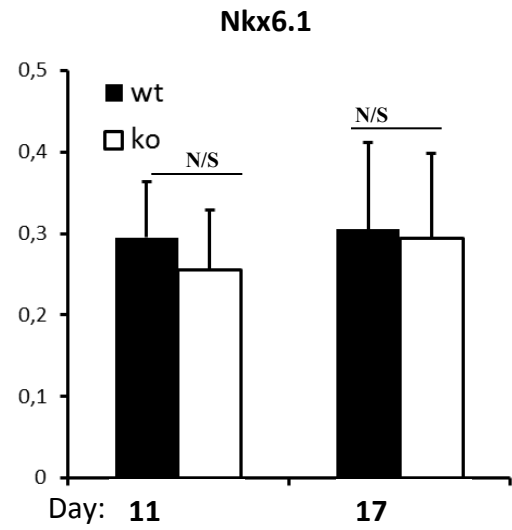

Figure S1

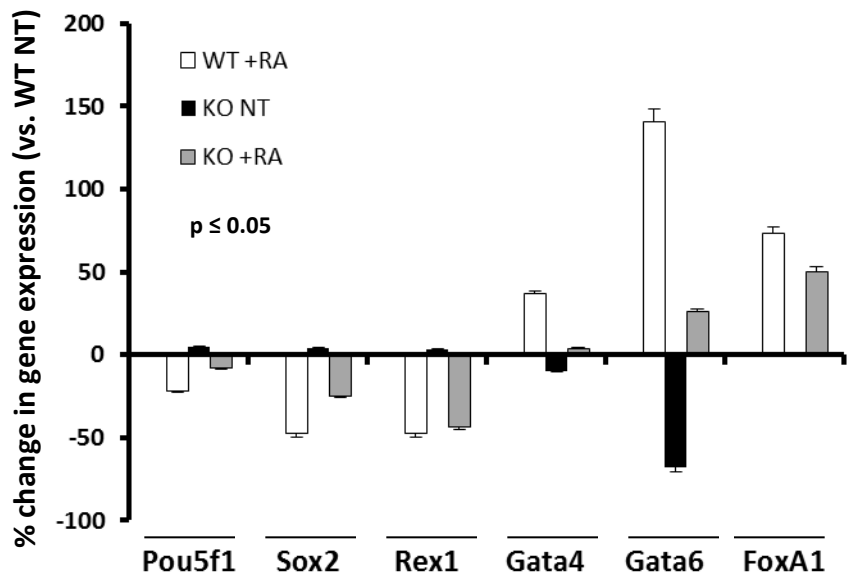

Figure S2
